# Supplementary material for: Synthesis of BaTiO3nanoparticles as shape modified filler for high dielectric constant ceramic–polymer composite
Source: Royal Society of Chemistry journal article supplement (doi:10.1039/d0ra04196c), 2020-01-01
Supplement: d0ra04196c1.pdf [file d0ra04196c1.pdf]

### Supplementary information

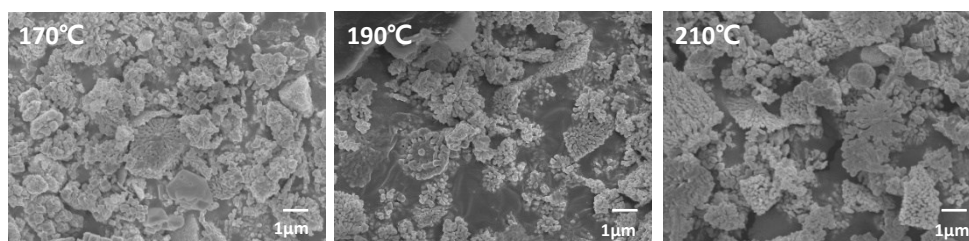

**Fig. S1** FE-SEM images of BT particles after hydrothermal synthesis by reaction temperature (x5000)

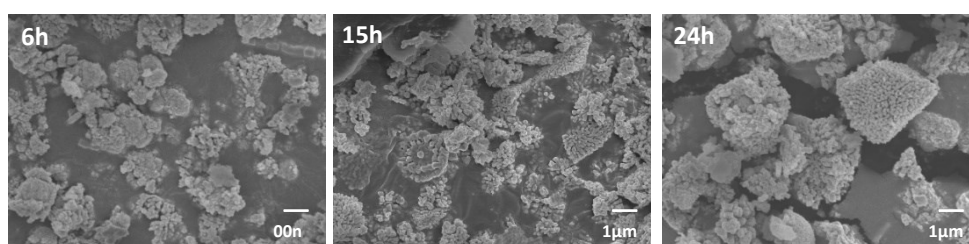

**Fig. S2** FE-SEM images of BT particles after hydrothermal synthesis by reaction time (x5000)

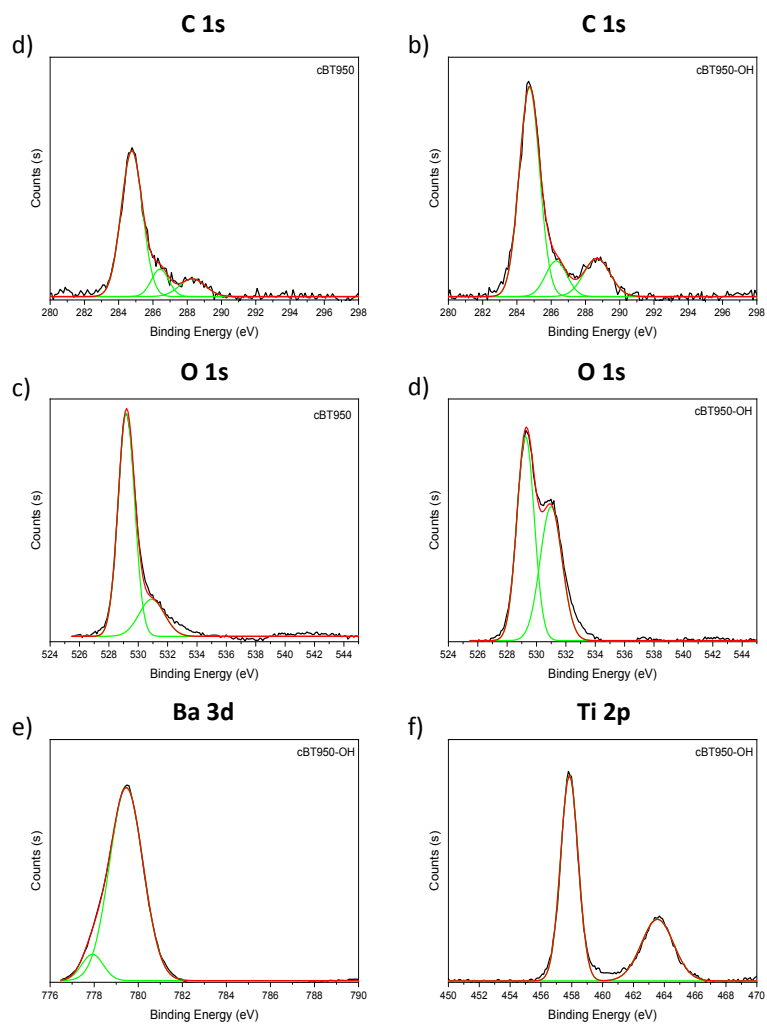

**Fig. S3** XPS photoelectron spectra of cBT950 before and after hydroxylation. a) cBT950 C 1s, b) cBT950-OH C 1s, c) cBT950 O 1s, d) cBT950-OH O 1s, e) cBT950-OH Ba 3d and f) cBT950-OH Ti 2p

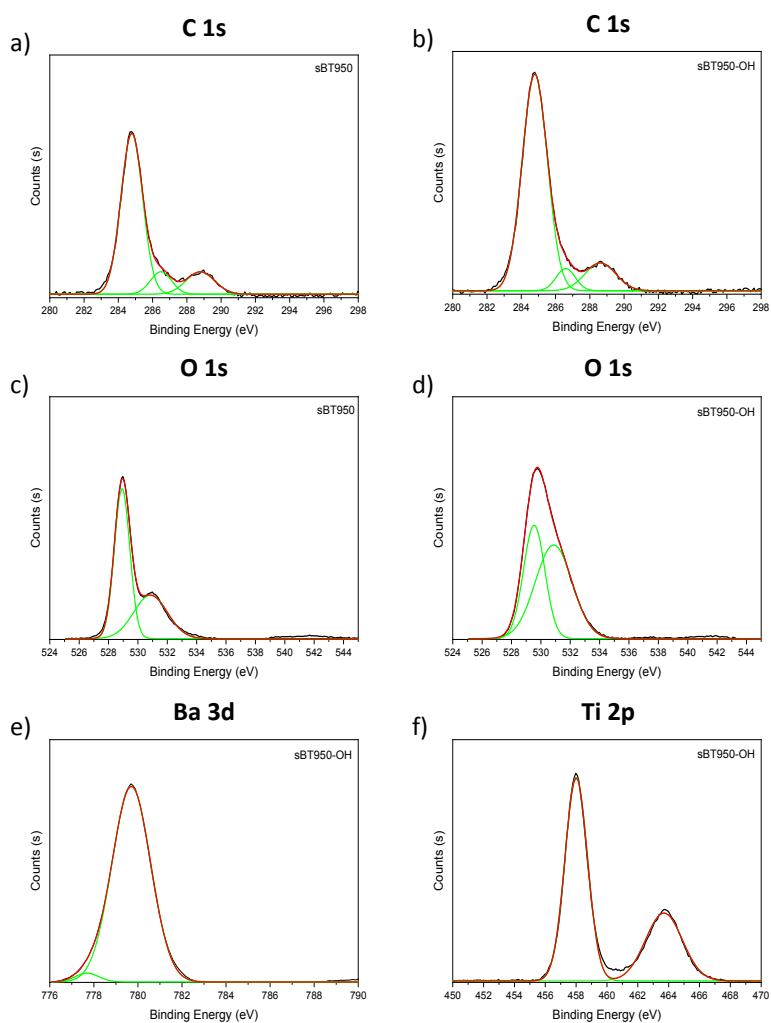

**Fig. S4** XPS photoelectron spectra of sBT950 before and after hydroxylation. a) sBT950 C 1s, b) sBT950-OH C 1s, c) sBT950 O 1s, d) sBT950-OH O 1s, e) sBT950-OH Ba 3d and f) sBT950-OH Ti 2p

**Table.S1**XPS integrated peak area of C 1s, O 1s, Ba 3d and Ti 2p in cBT950 series

|                  | C 1s   |                                     | O 1s   |                                     | Ba 3d  |                                     | Ti 2p  |                                     |
|------------------|--------|-------------------------------------|--------|-------------------------------------|--------|-------------------------------------|--------|-------------------------------------|
|                  | BE(eV) | Intensity integrated from peak area | BE(eV) | Intensity integrated from peak area | BE(eV) | Intensity integrated from peak area | BE(eV) | Intensity integrated from peak area |
| <b>cBT950</b>    | 284.77 | 6599                                | 529.18 | 29197                               |        |                                     |        |                                     |
|                  | 286.41 | 1013                                | 530.36 | 7418                                |        |                                     |        |                                     |
|                  | 288.30 | 979                                 |        |                                     |        |                                     |        |                                     |
| <b>cBT950-OH</b> | 284.73 | 9070                                | 529.26 | 27432                               | 777.92 | 92149                               | 457.85 | 21339                               |
|                  | 286.29 | 1628                                | 530.99 | 22823                               | 779.46 | 8047                                | 463.55 | 11720                               |
|                  | 288.67 | 2141                                |        |                                     |        |                                     |        |                                     |

**Table.S2**XPS integrated peak area of C 1s, O 1s, Ba 3d and Ti 2p in sBT950 series

|                  | C 1s   |                                     | O 1s   |                                     | Ba 3d  |                                     | Ti 2p  |                                     |
|------------------|--------|-------------------------------------|--------|-------------------------------------|--------|-------------------------------------|--------|-------------------------------------|
|                  | BE(eV) | Intensity integrated from peak area | BE(eV) | Intensity integrated from peak area | BE(eV) | Intensity integrated from peak area | BE(eV) | Intensity integrated from peak area |
| <b>sBT950</b>    | 284.78 | 35984                               | 528.92 | 122435                              |        |                                     |        |                                     |
|                  | 286.59 | 7040                                | 530.86 | 77519                               |        |                                     |        |                                     |
|                  | 288.62 | 4868                                |        |                                     |        |                                     |        |                                     |
| <b>sBT950-OH</b> | 284.78 | 58303                               | 529.54 | 128342                              | 777.69 | 534974                              | 458.01 | 123725                              |
|                  | 286.49 | 4542                                | 530.87 | 182148                              | 779.70 | 14707                               | 463.69 | 67286                               |
|                  | 288.78 | 9218                                |        |                                     |        |                                     |        |                                     |

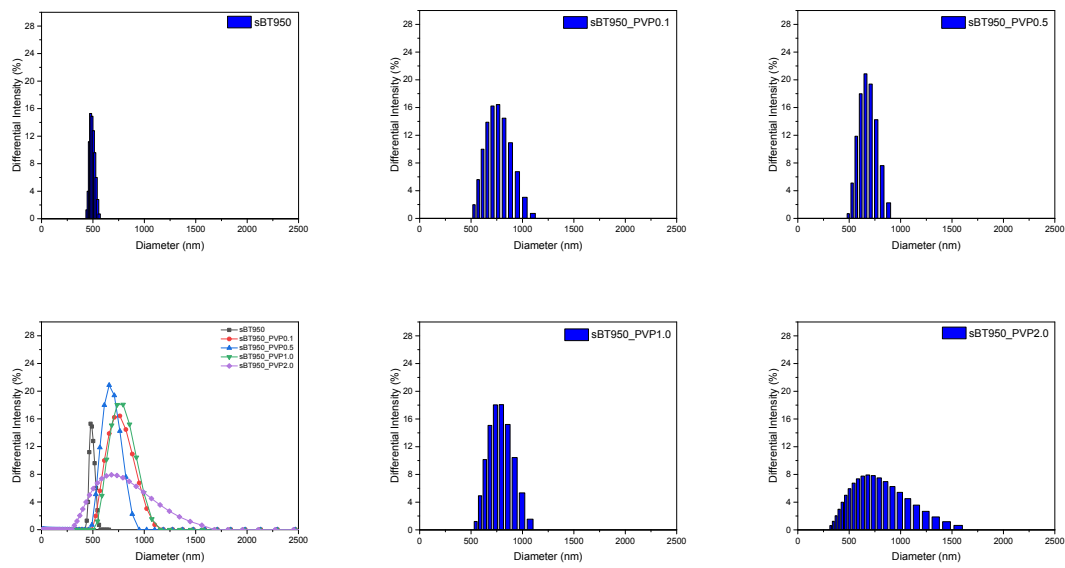

**Fig. S5** Particle size distribution of sBT950 series after modification by measuring PSA

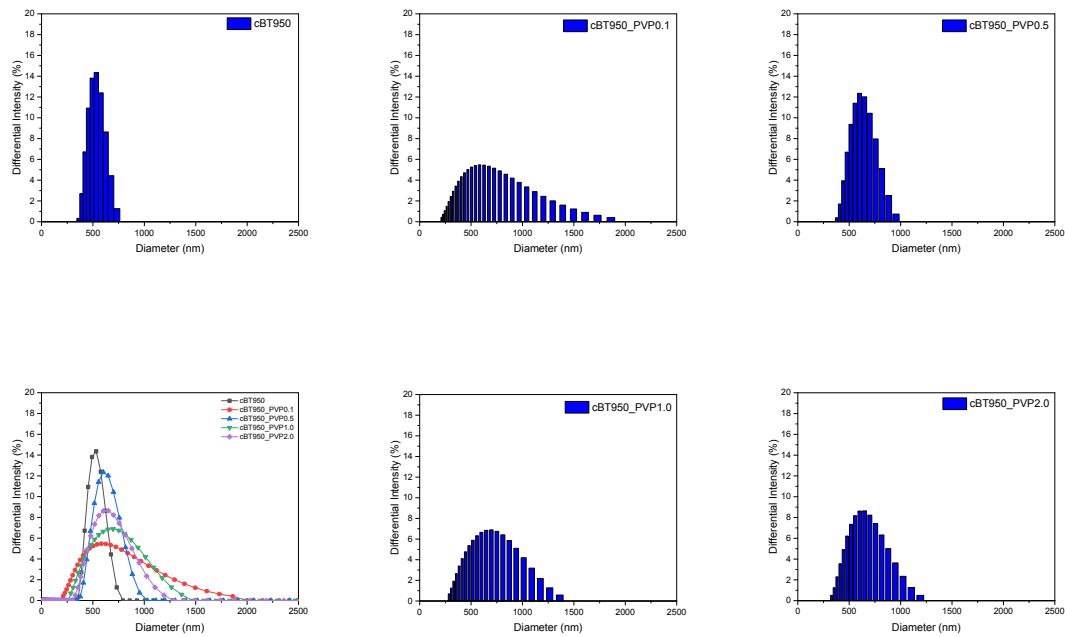

**Fig. S6** Particle size distribution of cBT950 series after modification by measuring PSA

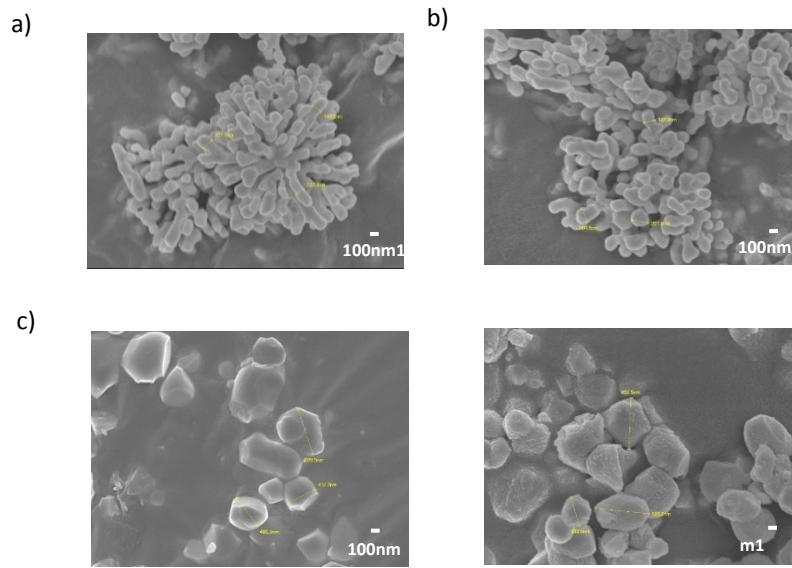

Fig. S8 FE-SEM images of BaTiO<sub>3</sub> composite in PDMS. (x500) a) cBT, b) cBT950\_PVP, c) sBT and d) sBT950\_PVP composite

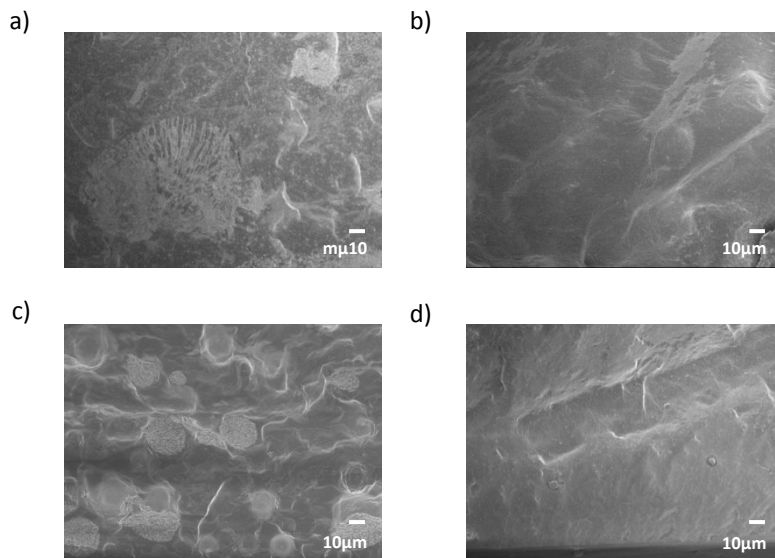

Fig. S8 FE-SEM images of BaTiO<sub>3</sub> composite in PDMS. (x500) a) cBT, b) cBT950\_PVP, c) sBT and d) sBT950\_PVP composite
